# Supplementary material
Source: PubMed Central journal article supplement (PMC3191013)
Supplement: supp_M111.264739_CochranSupplemental_FINAL_REVISED.pdf [file supp_M111.264739_CochranSupplemental_FINAL_REVISED.pdf]

# Supplemental material

## **OXIME-ASSISTED ACETYLCHOLINESTERASE CATALYTIC SCAVENGERS OF ORGANOPHOSPHATES THAT RESIST AGING**

**Rory Cochran<sup>1</sup>, Jaroslaw Kalisiak<sup>2</sup>, Tuba Kucukkilinc<sup>1</sup>, Zoran Radić<sup>1</sup>, Edzna Garcia<sup>1</sup>, Limin Zhang<sup>1</sup>, Kwok-Yiu Ho<sup>1</sup>, Gabriel Amitai<sup>3</sup>, Zrinka Kovarik<sup>4</sup>, Valery V. Fokin<sup>2</sup>, K. Barry Sharpless<sup>2</sup>, and Palmer Taylor<sup>1</sup>**

<sup>1</sup>Skaggs School of Pharmacy and Pharmaceutical Sciences, University of California at San Diego, La Jolla, CA 92093-0650

<sup>2</sup>Department of Chemistry and the Skaggs Institute for Chemical Biology, The Scripps Research Institute, La Jolla, CA 92037

<sup>3</sup>Division of Medicinal Chemistry, Israel Institute for Biological Research, P.O. Box 19, Ness Ziona 74100, Israel

<sup>4</sup>Institute for Medical Research and Occupational Health, P.O. Box 291, HR-10001 Zagreb, Croatia

Running Title: Aging resistant AChE based OP bio-scavengers

Address correspondence to: Palmer Taylor, SSPPS, UCSD, 9500 Gilman Drive, La Jolla, CA 92093-0657; Tel: 858-534-44028; Fax:858-534-8248; E-mail:pwtaylor@ucsd.edu

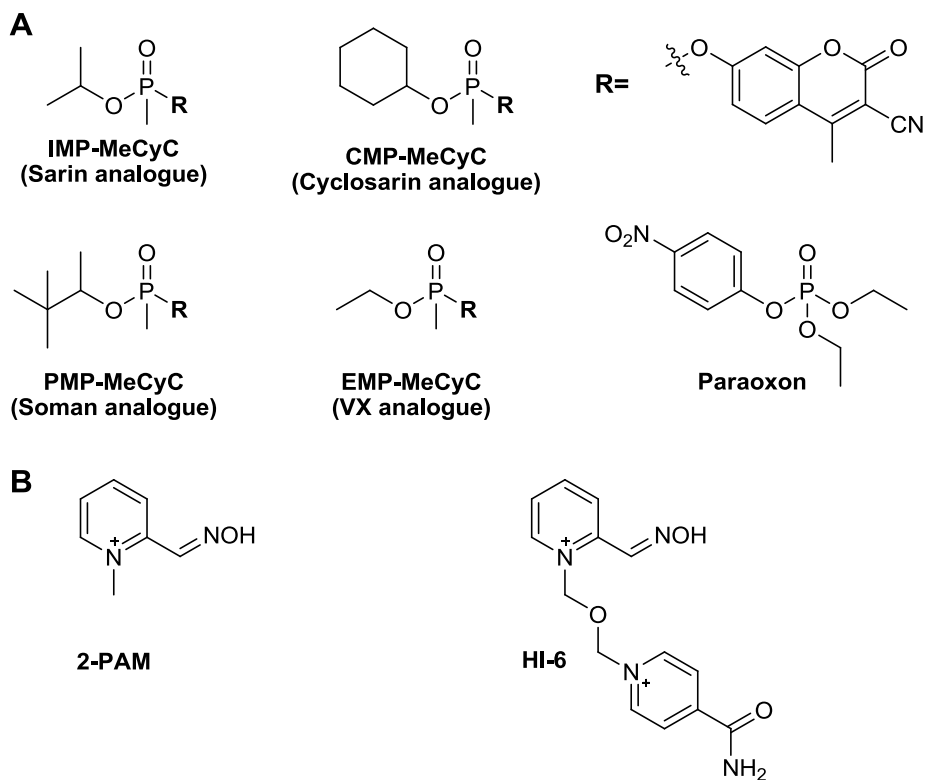

**Figure S1.** Structures of organophosphate inhibitors and oxime reactivators used in this study.

A) structures of the four Flu-MP nerve agent analogues (sarin, soman, cyclosarin, and VX) and paraoxon, the oxon form of the pesticide, parathion, and B) structures of the oximes 2-PAM and HI-6.

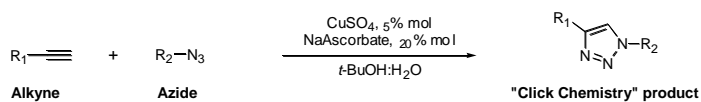

### List of used alkynes

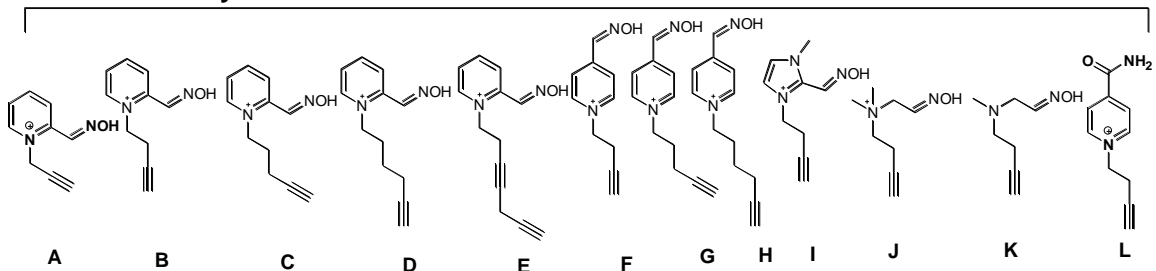

### A) List of used azides with alkynes B - K

|    | A | B | C | D | E | F |
|----|---|---|---|---|---|---|
| 1  |   |   |   |   |   |   |
| 2  |   |   |   |   |   |   |
| 3  |   |   |   |   |   |   |
| 4  |   |   |   |   |   |   |
| 5  |   |   |   |   |   |   |
| 6  |   |   |   |   |   |   |
| 7  |   |   |   |   |   |   |
| 8  |   |   |   |   |   |   |
| 9  |   |   |   |   |   |   |
| 10 |   |   |   |   |   |   |

### B) List of used azides with alkynes B - G, I, J and L (except combinations LD, LE and LF).

|   | A | B | C | D | E | F |
|---|---|---|---|---|---|---|
| 1 |   |   |   |   |   |   |
| 2 |   |   |   |   |   |   |

Figure S2: Library of novel click-chemistry oximes used in this study.

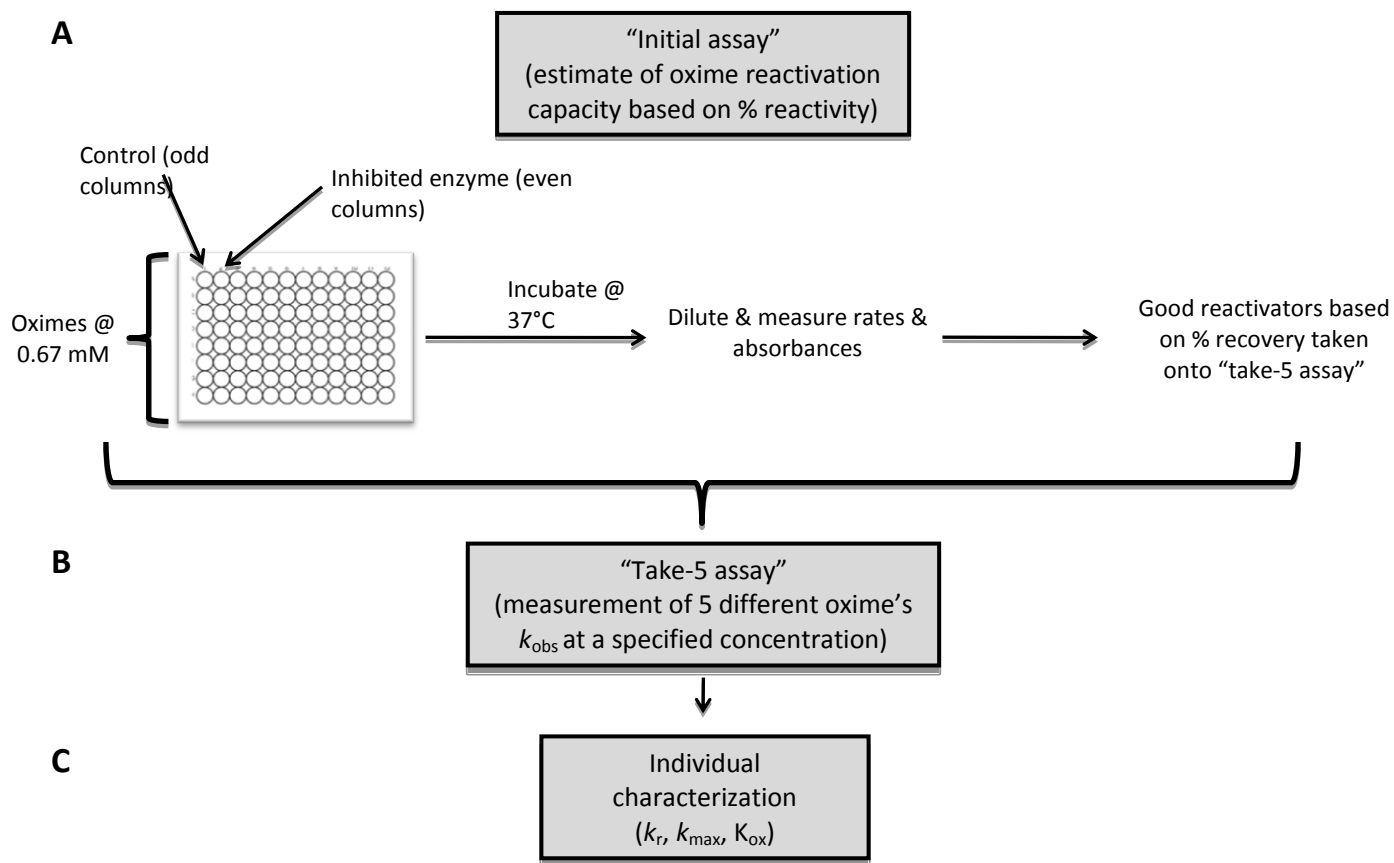

**Figure S3.** Schematic of the oxime screening procedure. A) oxime capacity for reactivation was assayed initially in a 96-well format. Oximes were aliquoted into two columns (48 oximes screened/96-well plate) for detecting both oxime inhibitory and reactivating properties. B) auspicious oximes were better characterized in a more rigorous format; screening five at a time to obtain  $k_{obs}$ . C) best reactivators were characterized to determine their  $k_r$ ,  $k_{max}$ ,  $K_{ox}$ .

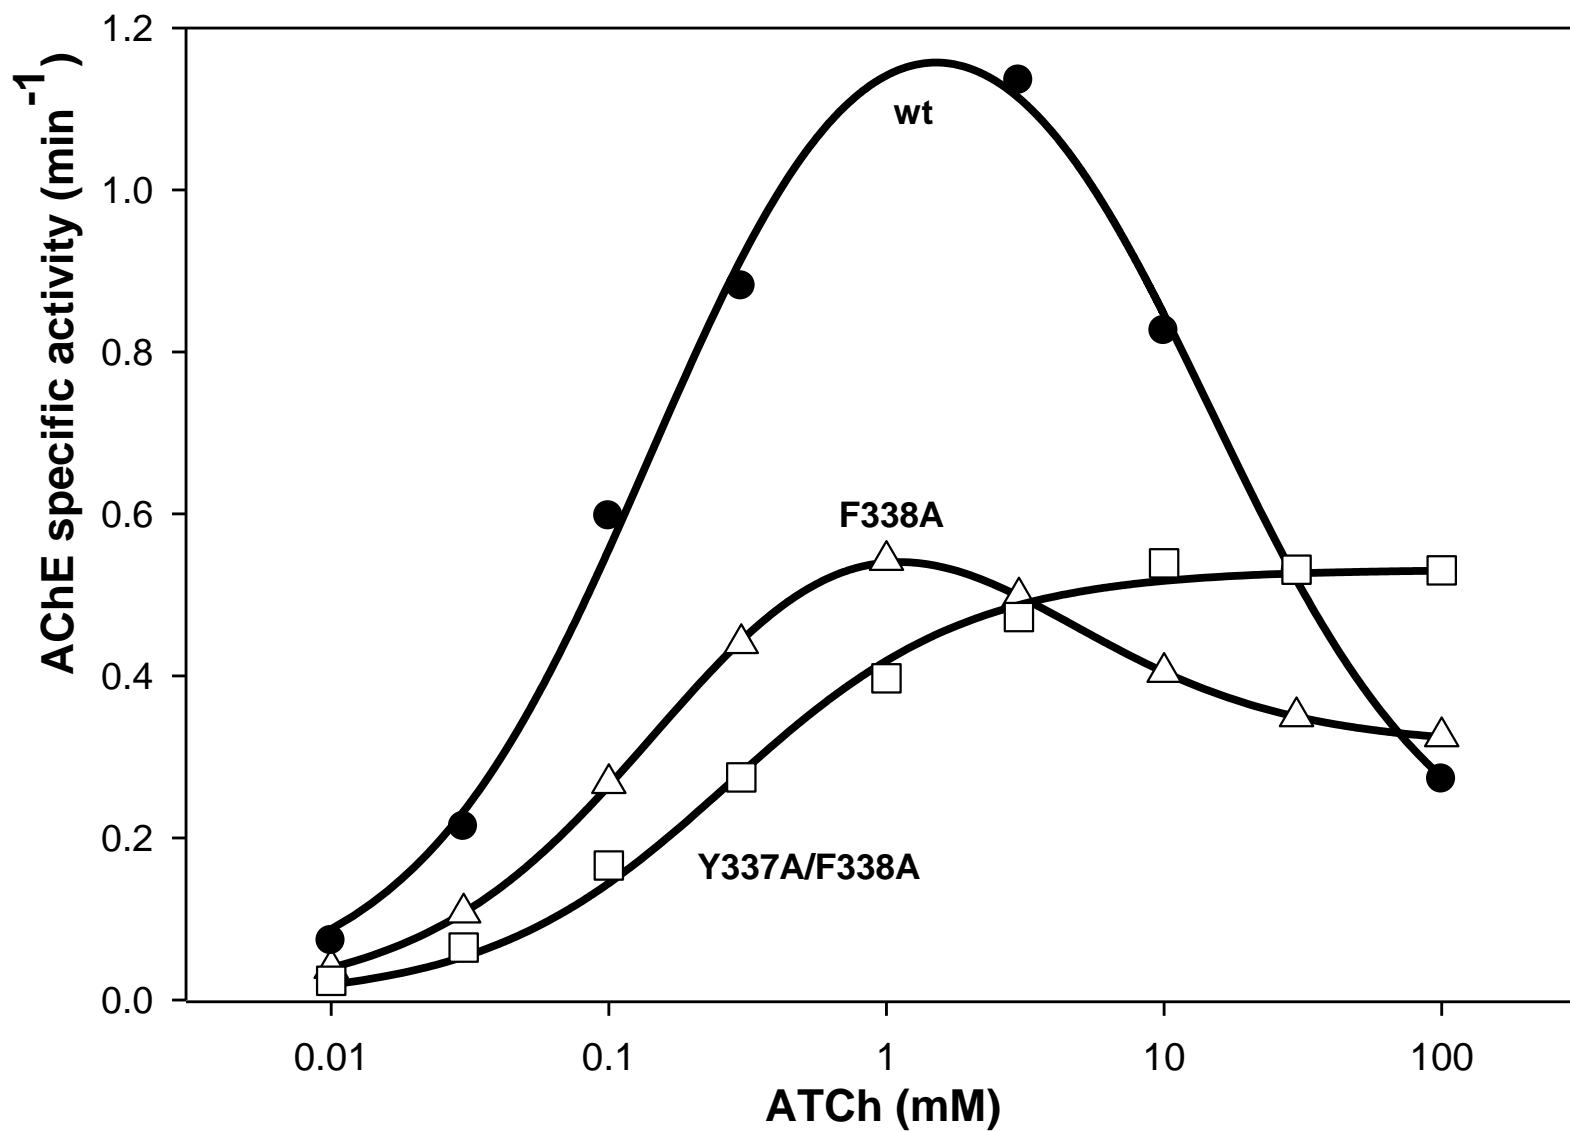

**Figure S4.** pS curves of enzyme activity for wt hAChE (circles) and mutants F338A (triangles), and Y337A/F338A (squares) in 0.1M phosphate buffer pH 7.4 at 22°C. Curves are obtained by nonlinear regression and resulting constants are given in Table 1.

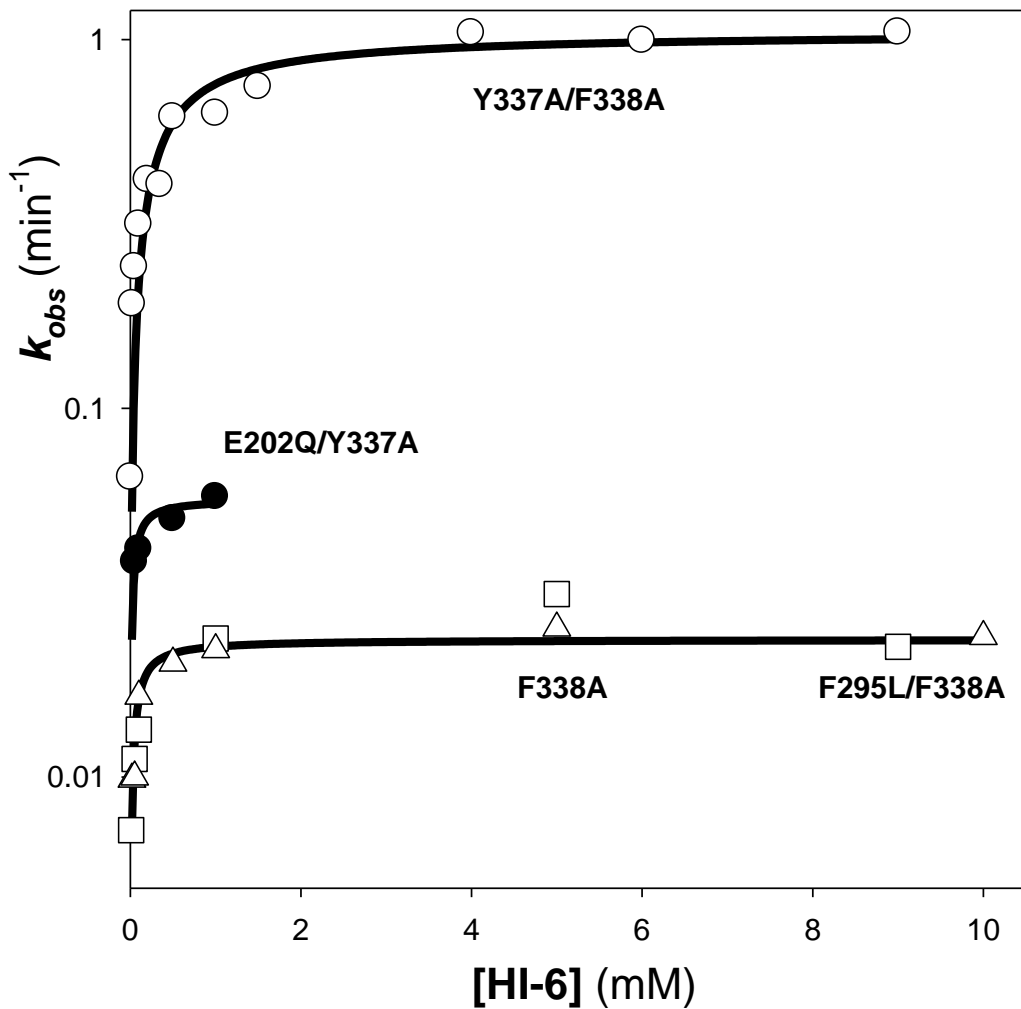

**Figure S5.** Semi-log representation of reactivation kinetics of soman inhibited human AChE mutants refractory to aging, by HI-6, presented in Figure 2. Reactivation constants determined by nonlinear regression of data for human AChE mutants F338A (squares), E202Q/Y337A (black circles), F295L/F338A (triangles) and Y337A/F338A (white circles) in 0.1M phosphate buffer pH 7.4 at 22°C are given in Table 3.

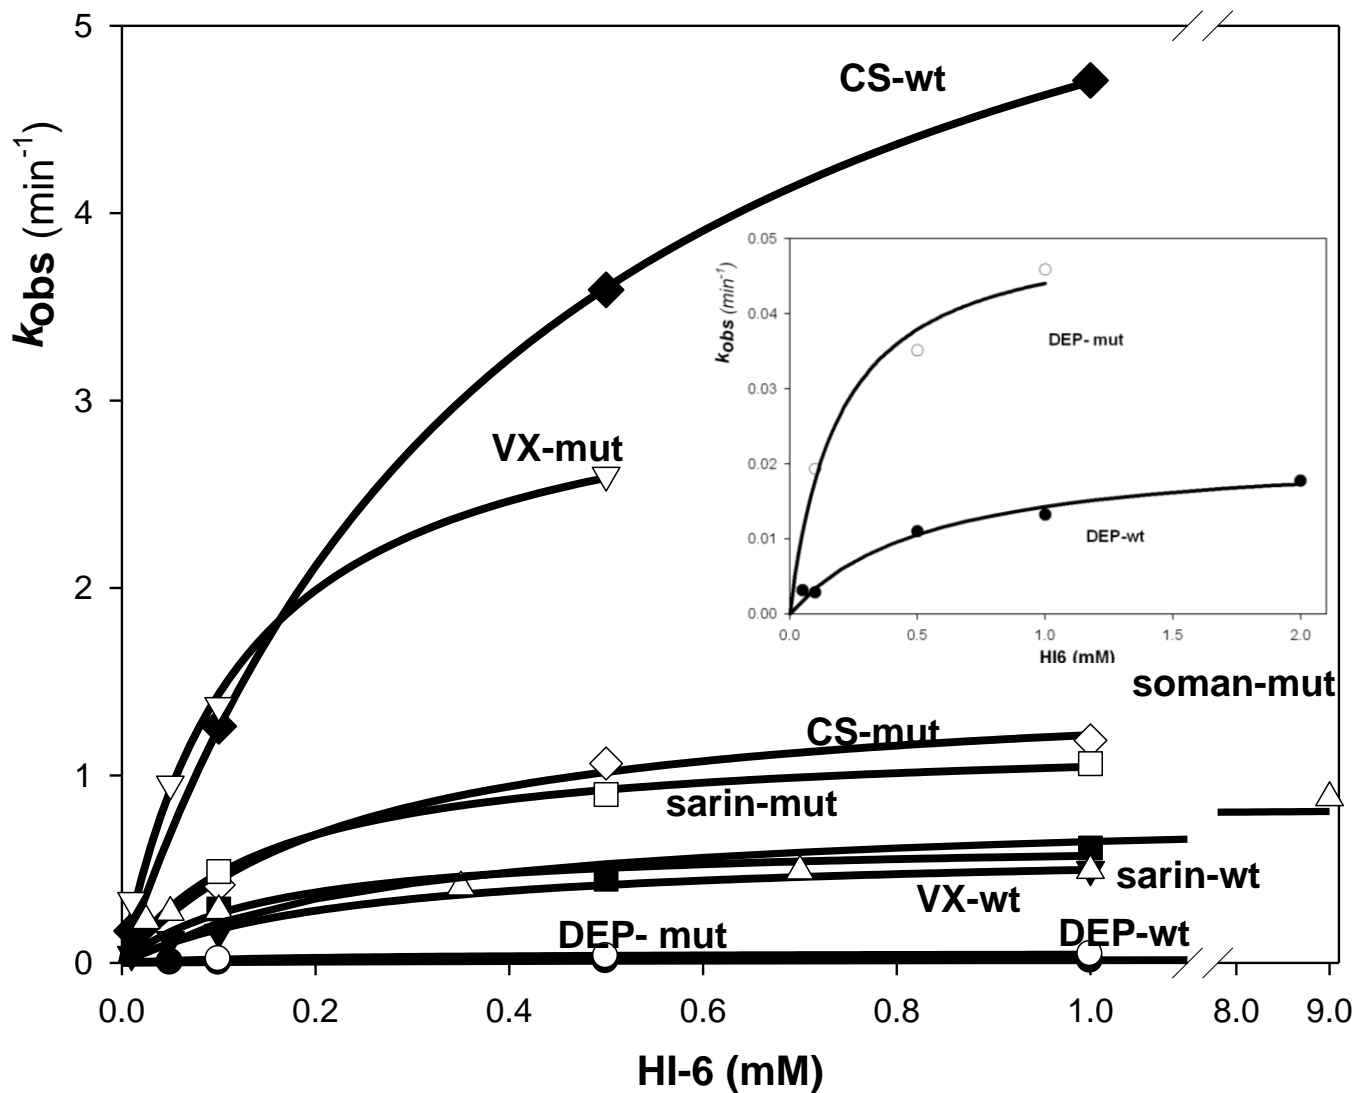

**Figure S6.** Reactivation kinetics for OP inhibited human AChE wild-type (black symbols) and Y337A/F338A mutant (white symbols) with HI-6 in 0.1M phosphate buffer pH 7.4 at 22°C. Enzymes were inhibited by paraoxon (circles), VX (inverted triangles), sarin (squares), cyclosarin (diamonds) and soman (triangles). Reactivation constants obtained by nonlinear regression are given in Table 4. Inset: Expanded Y-axis representation of paraoxon inhibited hAChE reactivation kinetics.

**Table S1.** Three top-ranked oxime candidates for reactivation of hAChE Y337A/F338A mutant inhibited with paraoxon. Reactivation was carried out in 0.1 M phosphate buffer pH 7.4 at 37 °C with 0.67 μM oxime concentration.

| Oxime | $k_{obs}(\text{min}^{-1})$ | Structure                                                                            |
|-------|----------------------------|--------------------------------------------------------------------------------------|
| 177   | 0.38                       | 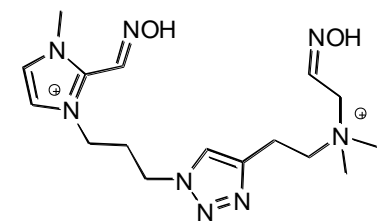   |
| D-C6  | 0.29                       |   |
| I-F4  | 0.27                       |  |
| 2-PAM | 0.18                       |  |
